# Supplementary material
Source: PubMed Central journal article supplement (PMC2555925)
Supplement: E08-03-0252_1.pdf [file E08-03-0252_1.pdf]

**Supplemental Figure Legends**

*Supplemental Figure 1.* Alpha factor release assay showed slower bud growth in *swf1Δ* cells (KKY1146; grey line, diamonds) relative to a congenic wild-type strain (KKY1147; black line, squares), in rich medium at 25°C. 100 cells were counted at each time point. In this experiment, at time 0, 93% and 99% of the *swf1Δ* and *SWF1* cultures, respectively, were unbudded. This experiment is representative of two independent assays.

*Supplemental Figure 2.* Immunoblot of 1 ng of recombinant GST and GST-Swf1-Cp probed with purified rabbit polyclonal antibody raised against GST-Swf1-Cp.

*Supplemental Figure 3.* GST-Swf1-Cp did not bind F- or G-actin. A) A supernatant depletion assay showed that a C-terminal fragment of Swf1p (amino acids 235-336) fused to GST (GST-Swf1-Cp) did not co-sediment with F-actin in a concentration dependent manner. The amount of F-actin added to each reaction was varied, while the concentration of GST-Swf1-Cp was held constant. Shown are the final actin and GST-Swf1-Cp concentrations in each reaction. After ultracentrifugation, equivalent volumes were analyzed on 13% SDS-PAGE gel stained with Coomassie Blue. B) A pyrene-actin assembly assay showed that a C-terminal fragment of Swf1p (GST-Swf1-Cp) did not bind G-actin at 25°C. The black curve represents the assembly of F-actin from 4 μM G-actin. The grey curve represents the assembly of F-actin from 4 μM G-actin in the presence of 7.4 μM GST-Swf1-Cp.

Supplemental Table 1. Bud morphology index of strains lacking *SWF1*

| Genotype           | %<br>Unbudded | %<br>Small-<br>Budded | %<br>Medium-<br>Budded | %<br>Large-<br>Budded | %<br>Multiple<br>Buds | Strain   |
|--------------------|---------------|-----------------------|------------------------|-----------------------|-----------------------|----------|
| <i>SWF1</i>        | 43            | 34                    | 10                     | 13                    | 0                     | KKY 1064 |
| <i>swf1Δ</i>       | 30            | 44                    | 9                      | 16                    | 1                     | KKY 1063 |
| <i>SWF1/SWF1</i>   | 39            | 34                    | 9                      | 19                    | 0                     | DDY 1102 |
| <i>swf1Δ/swf1Δ</i> | 35            | 43                    | 11                     | 12                    | 0                     | KKY 1060 |

500 cells of each strain, grown in rich medium in log-phase at 25°C, were scored by phase-contrast microscopy. A cell was scored as unbudded if no bud was observed, small-budded if the bud volume appeared <30% the volume of the mother cell, medium-budded if the bud volume appeared 30-50% the volume of the mother cell, and large-budded if bud volume appeared >50% the volume of the mother cell. Before scoring, cells were fixed with 3.4% formaldehyde and sonicated briefly. Other *swf1Δ* strains (not shown) gave a similar budding index.

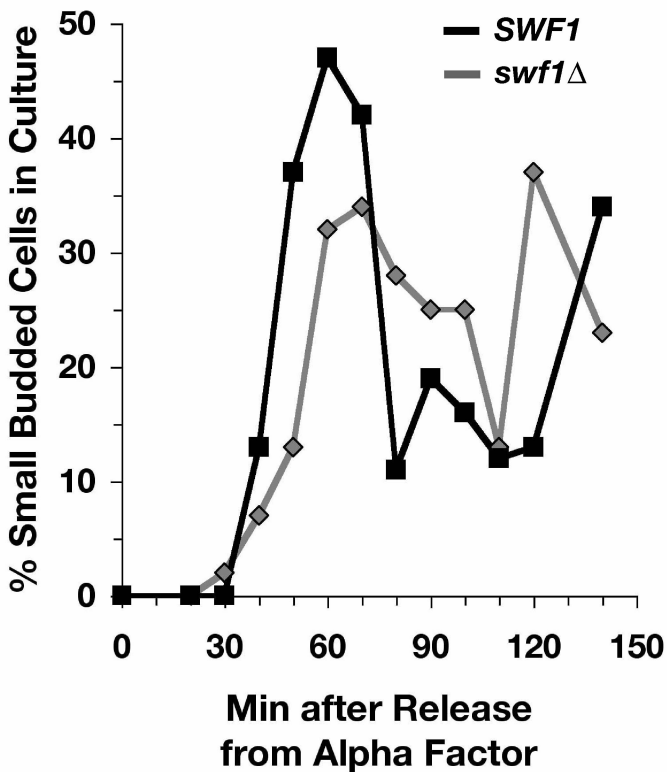

**Supplemental Figure 1**

**GST**

**GST-Swift-C**

**45 kD**

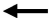

**31**

**21**

**14**

**Supplemental  
Figure 2**

**A**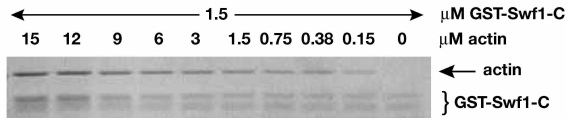**B**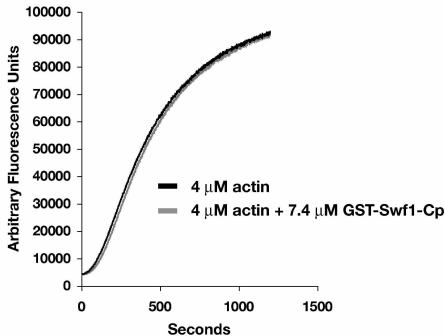**Supplemental Figure 3**
